# Supplementary material for: Retracted article: Design of nanoporous metals with bimodal pore size distributions for enhanced biosensing
Source: Royal Society of Chemistry journal article supplement (doi:10.1039/c2nr30460k), 2012-01-01
Supplement: c2nr30460k_2.pdf [file c2nr30460k_2.pdf]

## Supporting Information

Design nanoporous metals with bimodal pore size distributions for enhanced  
biosensing

Huajun Qiu<sup>\*ac</sup>, Xiaochen Dong<sup>b</sup> and Xirong Huang

*<sup>a</sup>School of Chemistry and Chemical Engineering, Shandong University, Jinan 250100, China*

*<sup>b</sup>Key Laboratory for Organic Electronics & Information Displays, Institute of Advanced Materials, Nanjing University of Posts and Telecommunications, 9 Wenyuan Road, Nanjing, 210046, China*

*<sup>c</sup>WPI Advanced Institute for Materials Research, Tohoku University, Sendai 980-8577, Japan*

\*E-mail: qiuhuajun@gmail.com

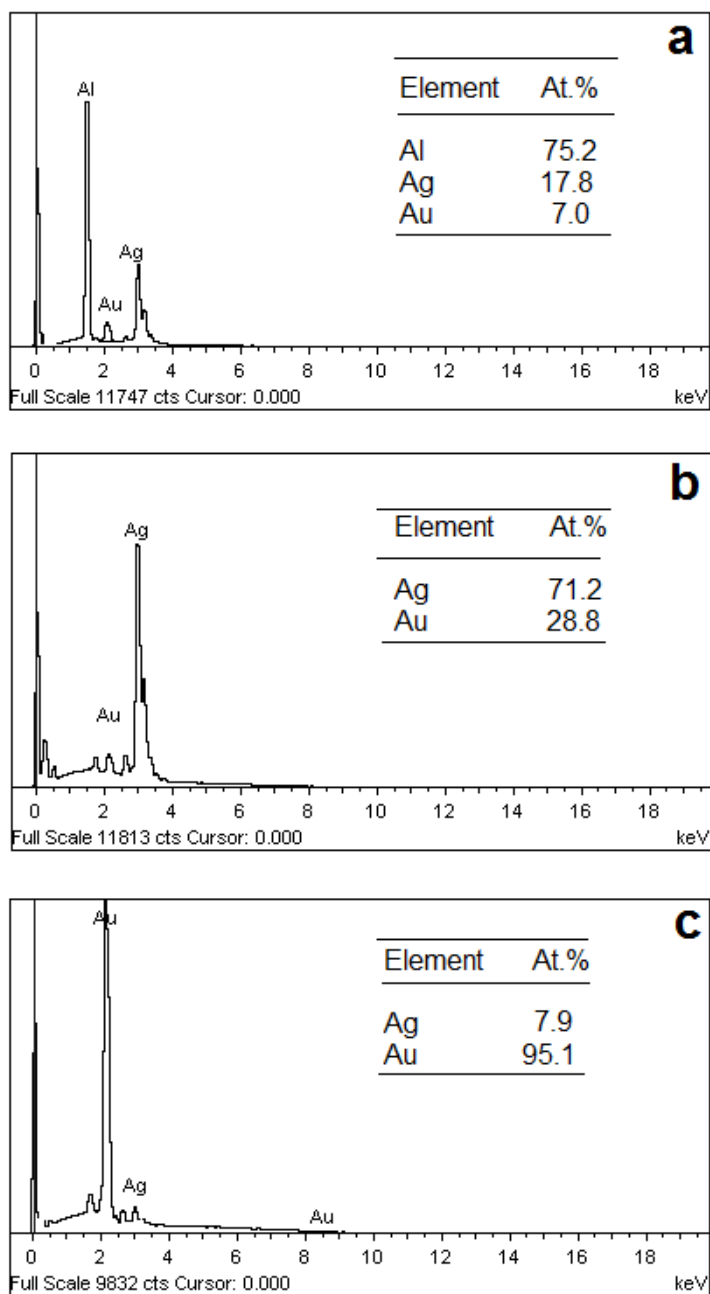

Fig. S-1 EDS spectra of AuAgAl precursor alloy (a), nanoporous AuAg alloy (b) and bimodal np-Au (c).
